# Supplementary material for: The Global Prevalence of Vitamin D Deficiency and Insufficiency in Patients with Multiple Myeloma: A Systematic Review and Meta-Analysis
Source: MDPI journal article supplement (doi:10.3390/nu15143227), 2023-07-20
Supplement: s1 [file s1]

**A**

| Study ID                                      | Cases | Total | Prevalence | 95% C.I.      | Weight |
|-----------------------------------------------|-------|-------|------------|---------------|--------|
| <b>Vitamin D deficiency (Newly diagnosed)</b> |       |       |            |               |        |
| Gray 2018                                     | 7     | 88    | 8.0        | [ 2.3; 13.6]  | 16.9%  |
| El Kourshy 2020                               | 5     | 20    | 25.0       | [ 6.0; 44.0]  | 16.2%  |
| Greenfield 2014                               | 12    | 32    | 37.5       | [20.7; 54.3]  | 16.4%  |
| Badros 2008                                   | 40    | 100   | 40.0       | [30.4; 49.6]  | 16.8%  |
| Diamond 2010                                  | 53    | 108   | 49.1       | [39.6; 58.5]  | 16.8%  |
| Graklanov 2020                                | 36    | 37    | 97.3       | [92.1; 100.0] | 16.9%  |

**Random effects model**      **385**      **43.0** [ 6.8; 79.1]      **100.0%**

Heterogeneity:  $I^2 = 99\%$ ,  $\tau^2 = 0.1999$ ,  $\chi^2_5 = 538.88$  ( $p < 0.01$ )

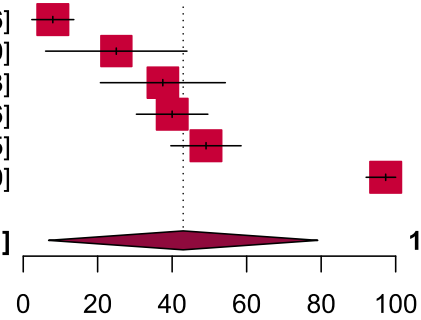**B**

| Study ID                                         | Cases | Total | Prevalence | 95% C.I.     | Weight |
|--------------------------------------------------|-------|-------|------------|--------------|--------|
| <b>Vitamin D insufficiency (Newly diagnosed)</b> |       |       |            |              |        |
| Graklanov 2020                                   | 1     | 37    | 2.7        | [ 0.0; 7.9]  | 20.3%  |
| Gray 2018                                        | 9     | 88    | 10.2       | [ 3.9; 16.6] | 20.3%  |
| Badros 2008                                      | 35    | 100   | 35.0       | [25.7; 44.3] | 20.0%  |
| Lee 2016                                         | 16    | 35    | 45.7       | [29.2; 62.2] | 19.0%  |
| Hudzik 2015                                      | 394   | 675   | 58.4       | [54.7; 62.1] | 20.4%  |

**Random effects model**      **935**      **30.2** [ 3.2; 57.2]      **100.0%**

Heterogeneity:  $I^2 = 99\%$ ,  $\tau^2 = 0.0926$ ,  $\chi^2_4 = 358.79$  ( $p < 0.01$ )

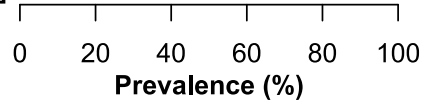**C**

| Study ID                                      | Cases | Total | Prevalence | 95% C.I.      | Weight |
|-----------------------------------------------|-------|-------|------------|---------------|--------|
| <b>Vitamin D deficiency (Under treatment)</b> |       |       |            |               |        |
| Ravenborg 2014                                | 24    | 169   | 14.2       | [ 8.9; 19.5]  | 14.5%  |
| Wang 2016                                     | 17    | 109   | 15.6       | [ 8.8; 22.4]  | 14.4%  |
| Ng 2009                                       | 35    | 148   | 23.6       | [16.8; 30.5]  | 14.4%  |
| Yellapragada 2020                             | 453   | 1889  | 24.0       | [22.1; 25.9]  | 14.6%  |
| Pasamonte 2019                                | 7     | 22    | 31.8       | [12.4; 51.3]  | 13.2%  |
| Oortgiesen 2019                               | 106   | 120   | 88.3       | [82.6; 94.1]  | 14.5%  |
| Yokus 2017                                    | 29    | 31    | 93.5       | [84.9; 100.0] | 14.3%  |

**Random effects model**      **2488**      **41.6** [19.3; 64.0]      **100.0%**

Heterogeneity:  $I^2 = 99\%$ ,  $\tau^2 = 0.0888$ ,  $\chi^2_6 = 696.33$  ( $p < 0.01$ )

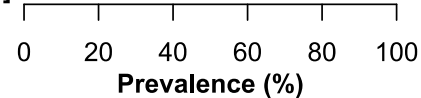

**D**

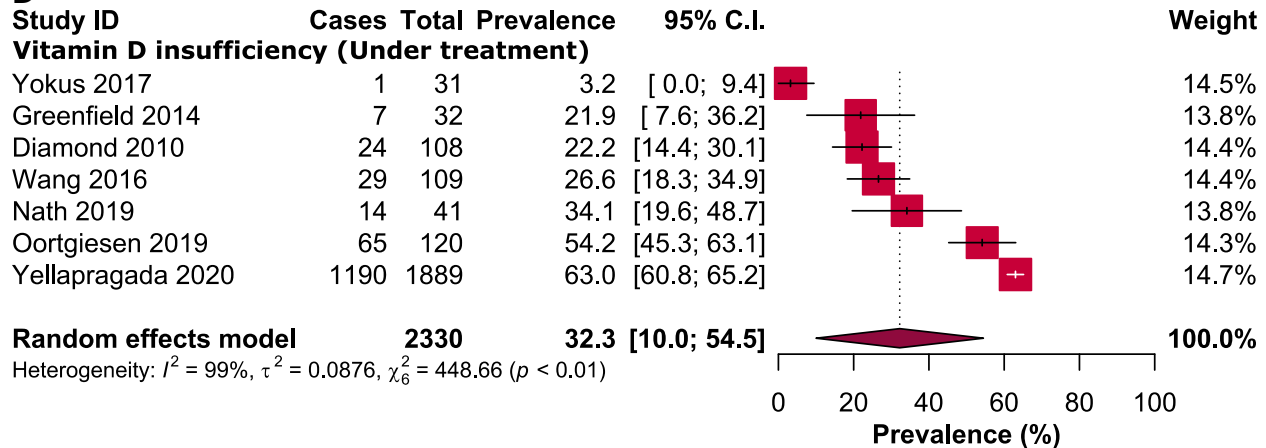

**E**

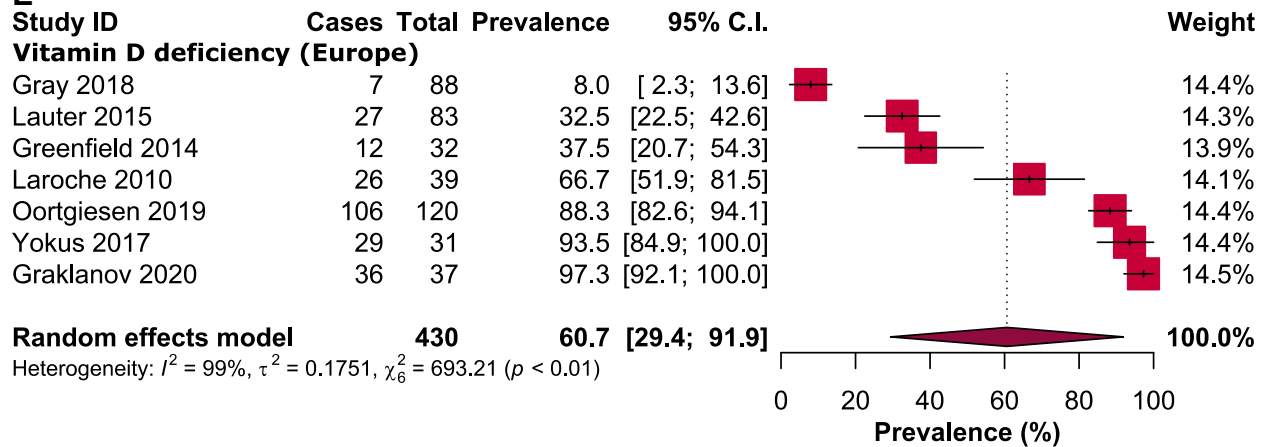

**F**

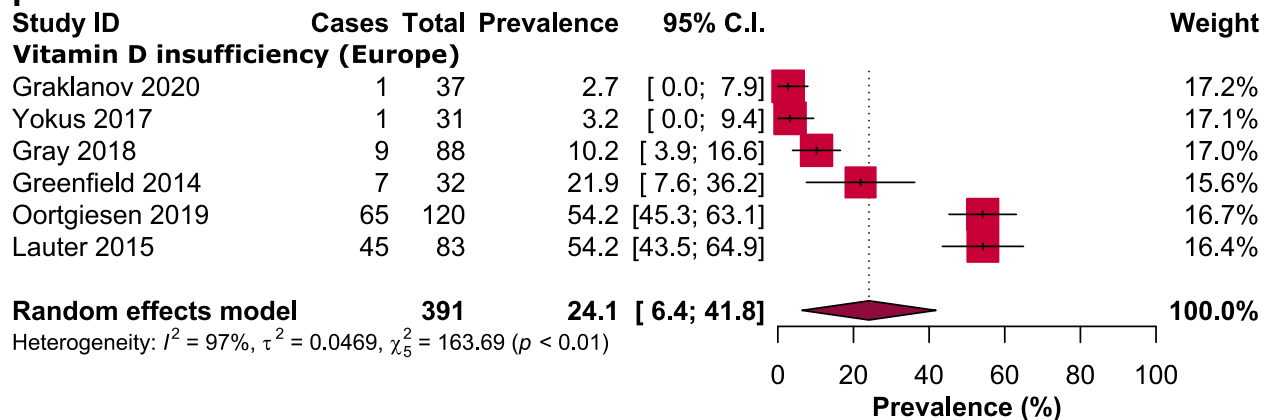

**G**

| Study ID                                    | Cases | Total | Prevalence | 95% C.I.     | Weight |
|---------------------------------------------|-------|-------|------------|--------------|--------|
| <b>Vitamin D deficiency (North America)</b> |       |       |            |              |        |
| Hudzik 2015                                 | 52    | 675   | 7.7        | [ 5.7; 9.7]  | 17.9%  |
| Ravenborg 2014                              | 24    | 169   | 14.2       | [ 8.9; 19.5] | 16.9%  |
| Wang 2016                                   | 17    | 109   | 15.6       | [ 8.8; 22.4] | 16.2%  |
| Ng 2009                                     | 35    | 148   | 23.6       | [16.8; 30.5] | 16.2%  |
| Yellapragada 2020                           | 453   | 1889  | 24.0       | [22.1; 25.9] | 17.9%  |
| Badros 2008                                 | 40    | 100   | 40.0       | [30.4; 49.6] | 14.7%  |

**Random effects model**      **3090**      **20.4 [11.8; 28.9]**      **100.0%**

Heterogeneity:  $I^2 = 97\%$ ,  $\tau^2 = 0.0105$ ,  $\chi^2_5 = 159.30$  ( $p < 0.01$ )

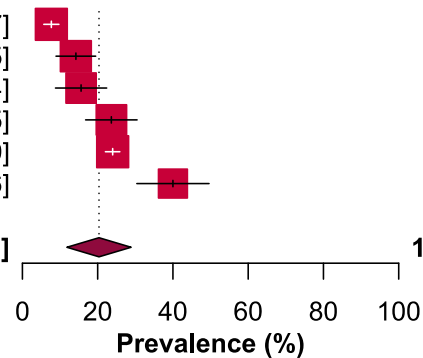**H**

| Study ID                                       | Cases | Total | Prevalence | 95% C.I.     | Weight |
|------------------------------------------------|-------|-------|------------|--------------|--------|
| <b>Vitamin D insufficiency (North America)</b> |       |       |            |              |        |
| Ravenborg 2014                                 | 37    | 169   | 21.9       | [15.7; 28.1] | 20.0%  |
| Wang 2016                                      | 29    | 109   | 26.6       | [18.3; 34.9] | 19.6%  |
| Badros 2008                                    | 35    | 100   | 35.0       | [25.7; 44.3] | 19.3%  |
| Hudzik 2015                                    | 394   | 675   | 58.4       | [54.7; 62.1] | 20.5%  |
| Yellapragada 2020                              | 1190  | 1889  | 63.0       | [60.8; 65.2] | 20.6%  |

**Random effects model**      **2942**      **41.3 [25.5; 57.0]**      **100.0%**

Heterogeneity:  $I^2 = 98\%$ ,  $\tau^2 = 0.0312$ ,  $\chi^2_4 = 223.68$  ( $p < 0.01$ )

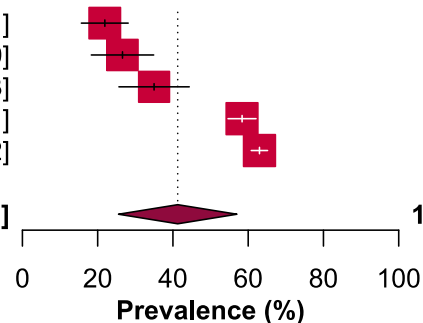**I**

| Study ID                                | Cases | Total | Prevalence | 95% C.I.     | Weight |
|-----------------------------------------|-------|-------|------------|--------------|--------|
| <b>Vitamin D deficiency (Australia)</b> |       |       |            |              |        |
| Nath 2019                               | 11    | 41    | 26.8       | [13.3; 40.4] | 29.4%  |
| Diamond 2010                            | 34    | 108   | 31.5       | [22.7; 40.2] | 70.6%  |

**Random effects model**      **149**      **30.1 [22.8; 37.5]**      **100.0%**

Heterogeneity:  $I^2 = 0\%$ ,  $\tau^2 = 0$ ,  $\chi^2_1 = 0.32$  ( $p = 0.57$ )

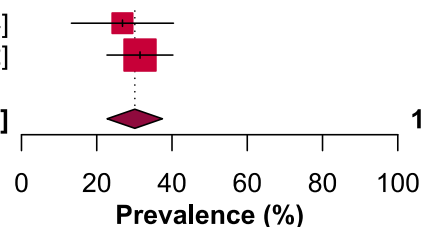**J**

| Study ID                                   | Cases | Total | Prevalence | 95% C.I.     | Weight |
|--------------------------------------------|-------|-------|------------|--------------|--------|
| <b>Vitamin D insufficiency (Australia)</b> |       |       |            |              |        |
| Diamond 2010                               | 24    | 108   | 22.2       | [14.4; 30.1] | 63.7%  |
| Nath 2019                                  | 14    | 41    | 34.1       | [19.6; 48.7] | 36.3%  |

**Random effects model**      **149**      **26.6 [15.3; 37.8]**      **100.0%**

Heterogeneity:  $I^2 = 50\%$ ,  $\tau^2 = 0.0036$ ,  $\chi^2_1 = 2.01$  ( $p = 0.16$ )

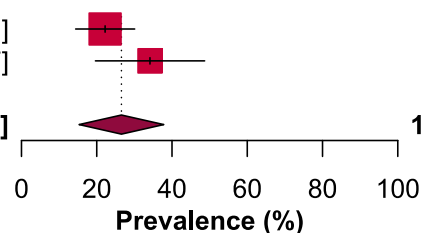

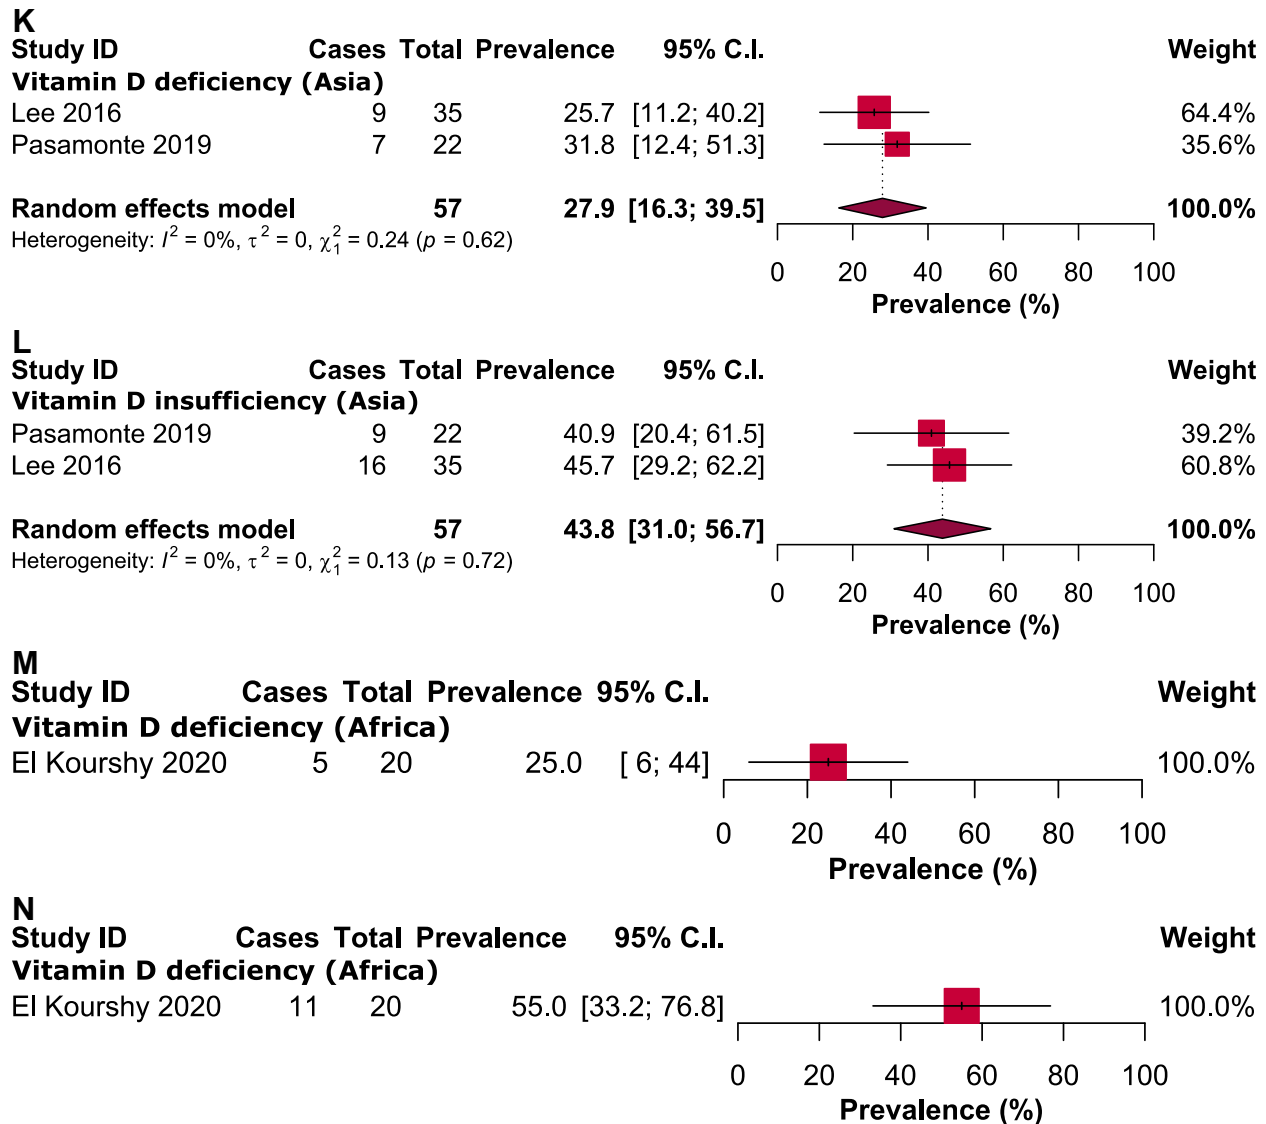

**Figure S1.** Subgroup analyses estimating the prevalence of vitamin D deficiency and insufficiency in (A-B) newly diagnosed, (C-D) under treatment and multiple myeloma patients from (E-N) different regions.

**A**

| Study ID                                                        | Cases | Total | Prevalence | 95% C.I.     | Weight |
|-----------------------------------------------------------------|-------|-------|------------|--------------|--------|
| <b>Vitamin D deficiency (Excluding small studies, n&lt;100)</b> |       |       |            |              |        |
| Hudzik 2015                                                     | 52    | 675   | 7.7        | [ 5.7; 9.7]  | 12.8%  |
| Ravenborg 2014                                                  | 24    | 169   | 14.2       | [ 8.9; 19.5] | 12.6%  |
| Wang 2016                                                       | 17    | 109   | 15.6       | [ 8.8; 22.4] | 12.5%  |
| Ng 2009                                                         | 35    | 148   | 23.6       | [16.8; 30.5] | 12.5%  |
| Yellapragada 2020                                               | 453   | 1889  | 24.0       | [22.1; 25.9] | 12.8%  |
| Badros 2008                                                     | 40    | 100   | 40.0       | [30.4; 49.6] | 12.2%  |
| Diamond 2010                                                    | 53    | 108   | 49.1       | [39.6; 58.5] | 12.2%  |
| Oortgiesen 2019                                                 | 106   | 120   | 88.3       | [82.6; 94.1] | 12.6%  |

**Random effects model**      **3318**      **32.7 [17.8; 47.6]**      **100.0%**  
Heterogeneity:  $I^2 = 99\%$ ,  $\tau^2 = 0.0451$ ,  $\chi^2_7 = 763.17$  ( $p < 0.01$ )

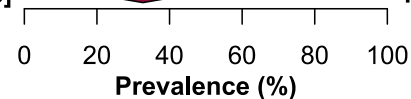**B**

| Study ID                                                           | Cases | Total | Prevalence | 95% C.I.     | Weight |
|--------------------------------------------------------------------|-------|-------|------------|--------------|--------|
| <b>Vitamin D insufficiency (Excluding small studies, n&lt;100)</b> |       |       |            |              |        |
| Ravenborg 2014                                                     | 37    | 169   | 21.9       | [15.7; 28.1] | 14.4%  |
| Diamond 2010                                                       | 24    | 108   | 22.2       | [14.4; 30.1] | 14.2%  |
| Wang 2016                                                          | 29    | 109   | 26.6       | [18.3; 34.9] | 14.1%  |
| Badros 2008                                                        | 35    | 100   | 35.0       | [25.7; 44.3] | 13.9%  |
| Oortgiesen 2019                                                    | 65    | 120   | 54.2       | [45.3; 63.1] | 14.0%  |
| Hudzik 2015                                                        | 394   | 675   | 58.4       | [54.7; 62.1] | 14.7%  |
| Yellapragada 2020                                                  | 1190  | 1889  | 63.0       | [60.8; 65.2] | 14.8%  |

**Random effects model**      **3170**      **40.4 [26.6; 54.2]**      **100.0%**  
Heterogeneity:  $I^2 = 98\%$ ,  $\tau^2 = 0.0335$ ,  $\chi^2_6 = 292.93$  ( $p < 0.01$ )

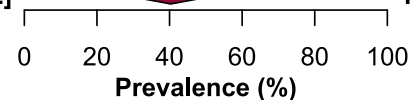**C**

| Study ID                                                                 | Cases | Total | Prevalence | 95% C.I.      | Weight |
|--------------------------------------------------------------------------|-------|-------|------------|---------------|--------|
| <b>Vitamin D deficiency (Excluding low and moderate-quality studies)</b> |       |       |            |               |        |
| Hudzik 2015                                                              | 52    | 675   | 7.7        | [ 5.7; 9.7]   | 7.4%   |
| Ravenborg 2014                                                           | 24    | 169   | 14.2       | [ 8.9; 19.5]  | 7.3%   |
| Wang 2016                                                                | 17    | 109   | 15.6       | [ 8.8; 22.4]  | 7.3%   |
| Ng 2009                                                                  | 35    | 148   | 23.6       | [16.8; 30.5]  | 7.3%   |
| Yellapragada 2020                                                        | 453   | 1889  | 24.0       | [22.1; 25.9]  | 7.4%   |
| El Kourshy 2020                                                          | 5     | 20    | 25.0       | [ 6.0; 44.0]  | 6.7%   |
| Lee 2016                                                                 | 9     | 35    | 25.7       | [11.2; 40.2]  | 7.0%   |
| Nath 2019                                                                | 11    | 41    | 26.8       | [13.3; 40.4]  | 7.0%   |
| Pasamonte 2019                                                           | 7     | 22    | 31.8       | [12.4; 51.3]  | 6.7%   |
| Lauter 2015                                                              | 27    | 83    | 32.5       | [22.5; 42.6]  | 7.2%   |
| Laroche 2010                                                             | 26    | 39    | 66.7       | [51.9; 81.5]  | 6.9%   |
| Oortgiesen 2019                                                          | 106   | 120   | 88.3       | [82.6; 94.1]  | 7.3%   |
| Yokus 2017                                                               | 29    | 31    | 93.5       | [84.9; 100.0] | 7.2%   |
| Graklanov 2020                                                           | 36    | 37    | 97.3       | [92.1; 100.0] | 7.3%   |

**Random effects model**      **3418**      **41.0 [25.0; 57.0]**      **100.0%**  
Heterogeneity:  $I^2 = 99\%$ ,  $\tau^2 = 0.0904$ ,  $\chi^2_{13} = 1783.72$  ( $p = 0$ )

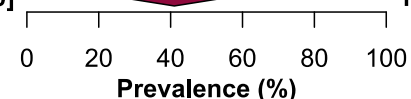

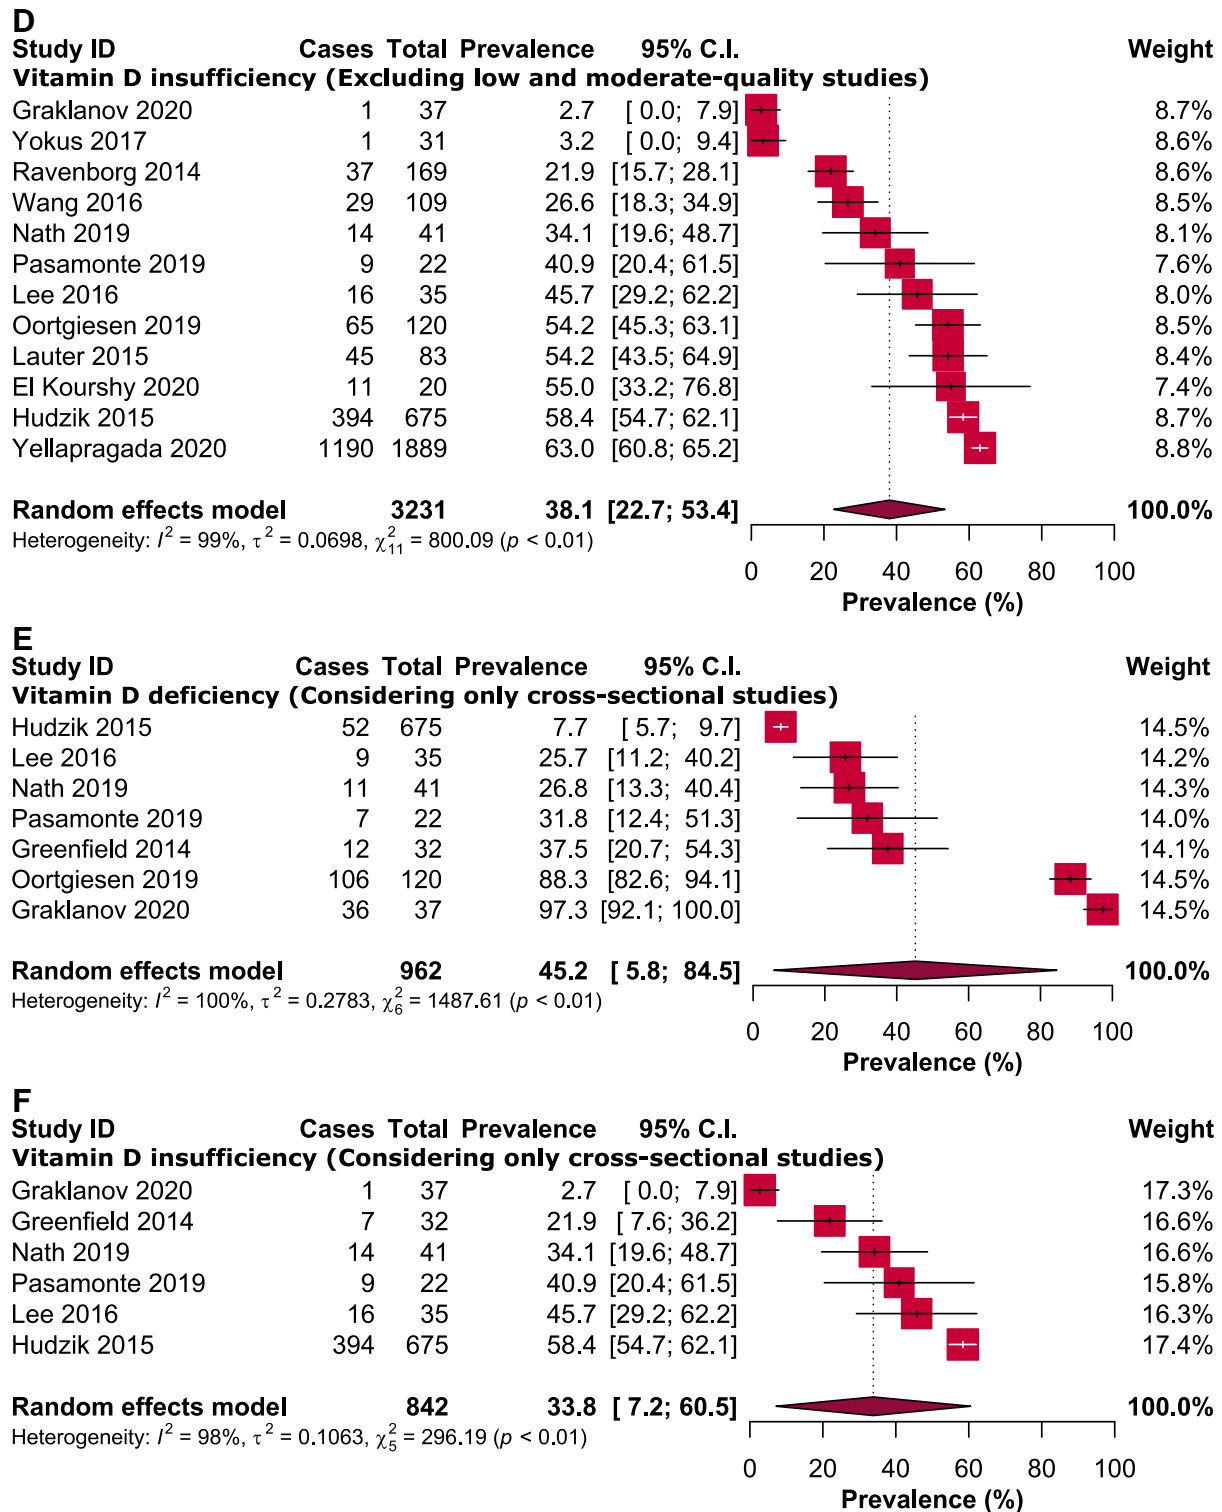

**Figure S2.** Sensitivity analyses (A-B) excluding small studies, (C-D) excluding low- and moderate-quality studies and (E-F) considering only cross-sectional studies estimating the prevalence of vitamin D deficiency and insufficiency in multiple myeloma patients.

**Table S1.** Search strategies

| <b>Databases</b>      | <b>Search strategies</b>                                                                                                                                                                                                                                                                                                                                                                                                                                                                                                                                                                                                                                                                                                                                      |
|-----------------------|---------------------------------------------------------------------------------------------------------------------------------------------------------------------------------------------------------------------------------------------------------------------------------------------------------------------------------------------------------------------------------------------------------------------------------------------------------------------------------------------------------------------------------------------------------------------------------------------------------------------------------------------------------------------------------------------------------------------------------------------------------------|
| <b>PubMed</b>         | (myeloma[Title/Abstract] OR "plasma cell dyscrasias"[Title/Abstract] OR myelomatosis[Title/Abstract] OR myelomatoses[Title/Abstract] OR "Kahler's disease"[Title/Abstract] OR "Kahler disease"[Title/Abstract]) AND ("vitamin D"[Title/Abstract] OR hypovitaminosis[Title/Abstract] OR hydroxyvitamin[Title/Abstract] OR "25 OH D"[Title/Abstract])                                                                                                                                                                                                                                                                                                                                                                                                           |
| <b>Scopus</b>         | TITLE-ABS(myeloma OR "plasma cell dyscrasias" OR myelomatosis OR myelomatoses OR "Kahler's disease" OR "Kahler disease") AND TITLE-ABS("vitamin D" OR "hypovitaminosis" OR hydroxyvitamin OR "25 OH D")                                                                                                                                                                                                                                                                                                                                                                                                                                                                                                                                                       |
| <b>Web of Science</b> | <p>#1<br/> TI=(myeloma OR "plasma cell dyscrasias" OR myelomatosis OR myelomatoses OR "Kahler's disease" OR "Kahler disease") AND TI=("vitamin D" OR "hypovitaminosis" OR hydroxyvitamin OR "25 OH D")<br/> Indexes=SCI-EXPANDED, SSCI, A&amp;HCI, CPCI-S, CPCI-SSH, BKCI-S, BKCI-SSH, ESCI Timespan=All years</p> <p>#2<br/> AB=(myeloma OR "plasma cell dyscrasias" OR myelomatosis OR myelomatoses OR "Kahler's disease" OR "Kahler disease") AND AB=("vitamin D" OR "hypovitaminosis" OR hydroxyvitamin OR "25 OH D")<br/> Indexes=SCI-EXPANDED, SSCI, A&amp;HCI, CPCI-S, CPCI-SSH, BKCI-S, BKCI-SSH, ESCI Timespan=All years</p> <p>#1 OR #2<br/> Indexes=SCI-EXPANDED, SSCI, A&amp;HCI, CPCI-S, CPCI-SSH, BKCI-S, BKCI-SSH, ESCI Timespan=All years</p> |
| <b>Google Scholar</b> | allintitle:(myeloma OR "plasma cell dyscrasias" OR myelomatosis OR myelomatoses OR "Kahler's disease" OR "Kahler disease") ("vitamin D" OR "hypovitaminosis" OR hydroxyvitamin OR "25 OH D")                                                                                                                                                                                                                                                                                                                                                                                                                                                                                                                                                                  |

|                      |                                                                                                                                                                                                              |
|----------------------|--------------------------------------------------------------------------------------------------------------------------------------------------------------------------------------------------------------|
| <b>ScienceDirect</b> | Title, abstract, keywords: (myeloma OR "plasma cell dyscrasias" OR myelomatosis OR myelomatoses OR "Kahler's disease" OR "Kahler disease") ("vitamin D" OR "hypovitaminosis" OR hydroxyvitamin OR "25 OH D") |
|----------------------|--------------------------------------------------------------------------------------------------------------------------------------------------------------------------------------------------------------|



**Table S2.** Quality assessment of the included cohort studies

| No. | Study ID          | Questions assessing the included cohort studies |   |   |   |   |   |   |   |    |    |    | Yes (%) |
|-----|-------------------|-------------------------------------------------|---|---|---|---|---|---|---|----|----|----|---------|
|     |                   | 1                                               | 2 | 3 | 4 | 5 | 6 | 7 | 8 | 9  | 10 | 11 |         |
| 1   | Badros 2008       | U                                               | Y | Y | Y | U | U | U | Y | NA | NA | Y  | 55.5    |
| 2   | Diamond 2010      | U                                               | Y | Y | Y | Y | Y | Y | U | U  | U  | Y  | 63.6    |
| 3   | Gray 2018         | U                                               | Y | U | Y | N | Y | U | Y | N  | N  | N  | 36.4    |
| 4   | Laroche 2010      | Y                                               | Y | Y | U | U | Y | Y | Y | Y  | NA | Y  | 80.0    |
| 5   | Lauter 2015       | Y                                               | Y | Y | Y | U | Y | Y | Y | Y  | Y  | Y  | 90.9    |
| 6   | Ng 2009           | Y                                               | Y | Y | Y | U | U | Y | Y | NA | NA | Y  | 77.7    |
| 7   | Ravenborg 2014    | Y                                               | Y | Y | U | U | Y | Y | Y | Y  | NA | Y  | 80.0    |
| 8   | Wang 2016         | Y                                               | Y | Y | U | U | Y | Y | Y | NA | NA | Y  | 77.7    |
| 9   | Yellapragada 2020 | Y                                               | Y | Y | U | U | Y | Y | Y | U  | U  | Y  | 63.6    |
| 10  | Yokus 2017        | Y                                               | Y | Y | Y | Y | Y | Y | Y | Y  | Y  | Y  | 100.0   |

1. Were the two groups similar and recruited from the same population? 2. Were the exposures measured similarly to assign people to both exposed and unexposed groups? 3. Was the exposure measured in a valid and reliable way? 4. Were confounding factors identified? 5. Were strategies to deal with confounding factors stated? 6. Were the groups/participants free of the outcome at the start of the study (or at the moment of exposure)? 7. Were the outcomes measured in a valid and reliable way? 8. Was the follow up time reported and sufficient to be long enough for outcomes to occur? 9. Was follow up complete, and if not, were the reasons to loss to follow up described and explored? 10. Were strategies to address incomplete follow up utilized? 11. Was appropriate statistical analysis used? Y=Yes; N=No; U=Unclear, NA=Not applicable.

**Table S3.** Quality assessment of the included cross-sectional studies

| No. | Study ID        | Questions assessing the included cross-sectional studies |   |   |   |   |   |   |   | Yes (%) |
|-----|-----------------|----------------------------------------------------------|---|---|---|---|---|---|---|---------|
|     |                 | 1                                                        | 2 | 3 | 4 | 5 | 6 | 7 | 8 |         |
| 1   | Graklanov 2020  | Y                                                        | Y | Y | Y | U | U | Y | Y | 75.0    |
| 2   | Greenfield 2014 | Y                                                        | Y | Y | Y | U | U | Y | N | 62.5    |
| 3   | Hudzik 2015     | Y                                                        | Y | Y | Y | U | U | Y | Y | 75.0    |
| 4   | Lee 2016        | Y                                                        | Y | Y | Y | U | U | Y | Y | 75.0    |
| 5   | Nath 2019       | Y                                                        | Y | Y | Y | Y | Y | Y | Y | 100.0   |
| 6   | Oortgiesen 2019 | Y                                                        | Y | Y | Y | U | U | Y | Y | 75.0    |
| 7   | Pasamonte 2019  | Y                                                        | Y | Y | Y | U | U | Y | Y | 75.0    |

1. Were the criteria for inclusion in the sample clearly defined? 2. Were the study subjects and the setting described in detail? 3. Was the exposure measured in a valid and reliable way? 4. Were objective, standard criteria used for measurement of the condition? 5. Were confounding factors identified? 6. Were strategies to deal with confounding factors stated? 7. Were the outcomes measured in a valid and reliable way? 8. Was appropriate statistical analysis used?

**Table S4.** Quality assessment of the included case-control studies

| No. | Study ID       | Questions assessing the included case-control studies |   |   |   |   |   |   |   |   |    | Yes (%) |
|-----|----------------|-------------------------------------------------------|---|---|---|---|---|---|---|---|----|---------|
|     |                | 1                                                     | 2 | 3 | 4 | 5 | 6 | 7 | 8 | 9 | 10 |         |
| 1   | El Koursh 2020 | Y                                                     | Y | Y | Y | Y | N | N | Y | Y | Y  | 80.0    |

1. Were the groups comparable other than the presence of disease in cases or the absence of disease in controls? 2. Were cases and controls matched appropriately? 3. Were the same criteria used for identification of cases and controls? 4. Was exposure measured in a standard, valid and reliable way? 5. Was exposure measured in the same way for cases and controls? 6. Were confounding factors identified? 7. Were strategies to deal with confounding factors stated? 8. Were outcomes assessed in a standard, valid and reliable way for cases and controls? 9. Was the exposure period of interest long enough to be meaningful? 10. Was appropriate statistical analysis used? Y=Yes; N=No; U=Unclear.
